# Supplementary material for: Long isoforms of NRF1 negatively regulate adipogenesis via suppression of PPARγ expression
Source: PubMed Central journal article supplement — Redox Biol. 2019 Dec 28;30:101414. doi: 10.1016/j.redox.2019.101414 (PMC6957832; doi:10.1016/j.redox.2019.101414), 2019-12-28
Supplement: mmc1.pdf [file mmc1.pdf]

# **Long Isoforms of NRF1 Negatively Regulate Adipogenesis via Suppression of PPAR $\gamma$ Expression**

Peng Xue, Yongyong Hou, Zhuo Zuo, Zhendi Wang, Suping Ren, Jian Dong, Jingqi Fu, Huihui Wang, Melvin E. Andersen, Qiang Zhang, Yuanyuan Xu, Jingbo Pi

**Table S1 : Primer sequences for RT-qPCR**

| Gene                                 | Forward (5'-3')           | Reverse (5'-3')          |
|--------------------------------------|---------------------------|--------------------------|
| <i>Nrf1-All isoforms (Primer-A)</i>  | CAGCAAGTGAGATTCTGTACAATGC | TGACATTCTGATTGATGGGAGTGT |
| <i>Nrf1-Long isoforms (Primer-L)</i> | AACGATCGAACGGCTCAACT      | GGAGCGAAAGCCACATTCAC     |
| <i>Nrf2</i>                          | CGAGATATACGCAGGAGAGGTAAGA | GCTCGACAATGTTCTCCAGCTT   |
| <i>Cebpa</i>                         | CGCAAGAGCCGAGATAAAGC      | CGGTCATTGTCACTGGTCAACT   |
| <i>Cebpβ</i>                         | AAGCTGAGCGACGAGTACAAGA    | GTCAGCTCCAGCACCTTGTG     |
| <i>Cebpδ</i>                         | GCCGTGCCACCCTAGA          | CGCTTTGTGGTTGCTGTTGA     |
| <i>Pparγ1</i>                        | GGGCTGAGGAGAAGTCACAC      | TGGTTCACCGCTTCTTTCA      |
| <i>Pparγ2</i>                        | TGCTGTTATGGGTGAAACTCTG    | CTGTGTCAACCATGGTAATTTCTT |
| <i>aP2</i>                           | GCGTGGAATTCGATGAAATCA     | CCCGCCATCTAGGGTTATGA     |
| <i>Lpl</i>                           | CATGGATGGACGGTAACGGG      | TTCTCTCTTGTACAGGGCGG     |
| <i>Pgc1α</i>                         | CCGTAGGCCCAGGTACGA        | TGCGGTATTCATCCCTCTTGA    |
| <i>Pgc1β</i>                         | GGCCTTGTGTCAAGGTGGAT      | GGTGCTTATGCAGTTCGGTACA   |
| <i>Adipsin</i>                       | GCTATCCCAGAATGCCTCGTT     | TTCCACTTCTTTGTCCTCGTATTG |
| <i>Ho1</i>                           | CCTCACTGGCAGGAAATCATC     | CCTCGTGGAGACGCTTTACATA   |
| <i>Nqo1</i>                          | TATCCTTCCGAGTCATCTCTAGCA  | TCTGCAGCTTCCAGCTTCTTG    |
| <i>Glut4</i>                         | CGCACTAGCTGAGCTGAAGGA     | AGGAGCTGGAGCAAGGACATT    |
| <i>Gclc</i>                          | TGGCCACTATCTGCCCAATT      | GTCTGACACGTAGCCTCGGTAA   |
| <i>Gclm</i>                          | ACATTGAAGCCCAGGATTGG      | CCCCTGCTCTTCACGATGAC     |
| <i>18s</i>                           | CGAACGTCTGCCCTATCAACTT    | CCGGAATCGAACCCCTGATT     |

**Table S2: Primers for cloning of *Ppary2* promoter-Luciferase reporters**

| Primer name            | Sequences (5'- 3')                   | Positions of inserts |
|------------------------|--------------------------------------|----------------------|
| <i>Ppary2</i> -Reverse | aaacggtaaAGATCTgctctgggtcaacaggagaa  |                      |
| <i>Ppary2</i> -F2601   | tgtaacactGATATCgggcaaaagaagggcg      | -2516 ~ +85 bp       |
| <i>Ppary2</i> -F1842   | tgtaacactGATATCggcctacacatgccaagcaaa | -1757 ~ +85 bp       |
| <i>Ppary2</i> -F1411   | tgtaacactGATATCagtgatccccatcattgg    | -1326 ~ +85 bp       |
| <i>Ppary2</i> -F934    | tgtaacactGATATCcttgccaacctagcagggta  | -849 ~ +85 bp        |
| <i>Ppary2</i> -F352    | tgtaacactGATATCgtgggtcactggcgagacaat | -267 ~ +85 bp        |
| <i>Ppary2</i> -F258    | tgtaacactGATATCcaactggctctcagtcagga  | -173 ~ +85 bp        |
| <i>Ppary2</i> -F138    | tgtaacactGATATCcgatgaccataagccttttc  | -53 ~ +85 bp         |

Note: AGATCT, *BGLII* site; GATATC, *EcoRV* site; Red text, target sequences on *Pparg2* promoter.

**Table S3: Primer sequences for CHIP PCR**

| Primer name | Sequences (5'- 3')      | Positions of <i>Ppary2</i> promoter |
|-------------|-------------------------|-------------------------------------|
| Primer1-F   | GCTCTGTGCCAGGCTCTGTG    | -2943 ~ -2500 bp                    |
| Primer1-R   | CGCCCTTCTTTTGCCC        |                                     |
| Primer2-F   | GGGCAAAGAAGGGCG         | -2516 ~ -2071 bp                    |
| Primer2-R   | AAGTGGGGGCTGGTCTAGCA    |                                     |
| Primer3-F   | TGCTAGACCAGCCCCACTT     | -2091 ~ -1664 bp                    |
| Primer3-R   | TCCTGTCCCAGATCCTGGTT    |                                     |
| Primer4-F   | GGCCTACACATGCCAAGCAA    | -1757 ~ -1312 bp                    |
| Primer4-R   | ATGGGGGATCACTGTGTTGGA   |                                     |
| Primer5-F   | CAGTGATCCCCATCATTTGG    | -1326 ~ -830 bp                     |
| Primer5-R   | ACCCTGCTAGGTTGGCAAGGA   |                                     |
| Primer6-F   | CTTGCCAACCTAGCAGGGTA    | -849 ~ -464 bp                      |
| Primer6-R   | TGGTTGAAACTCCTAATCACACA |                                     |
| Primer7-F   | TGGCAAATACGTTTATCTGGTG  | -440 ~ -31 bp                       |
| Primer7-R   | GGAAAAGGCTTATGGTCATCGAG |                                     |
| Primer8-F   | GTGGGTCCTGGCGAGACAAT    | -268 ~ +154 bp                      |
| Primer8-R   | TGCAGCAACATCAGGAATGGA   |                                     |

A

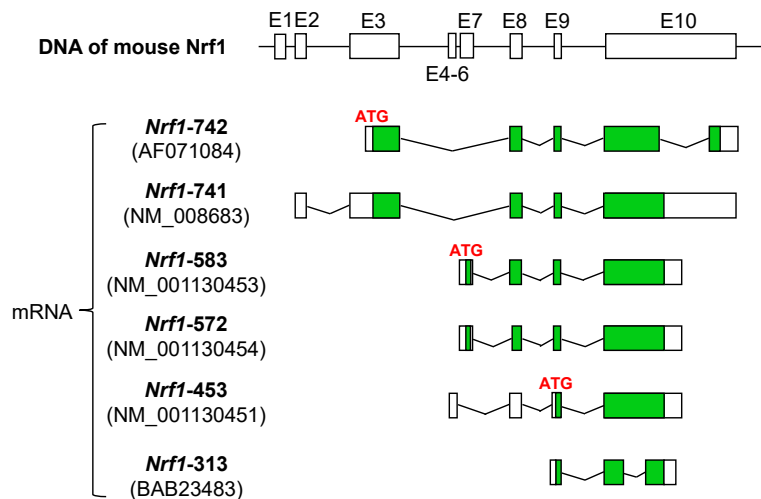

B

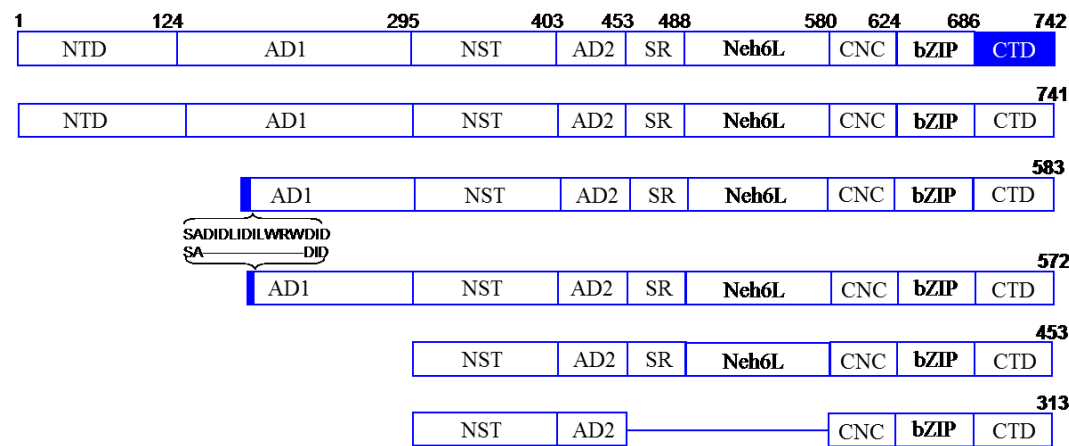

**Fig. S1. (A)** Schematic diagram of mouse *Nrf1* genomic sequence (Gene ID: ENSMUSG00000038615) and depiction of different isoforms of *Nrf1* transcripts. Sequences are from the National Center for Biotechnology ([www.ncbi.nlm.nih.gov](http://www.ncbi.nlm.nih.gov)) and Ensembl release 97 - July 2019 ([www.ensembl.org](http://www.ensembl.org)). Green and white open boxes represent coding regions and untranslated regions, respectively. Solid black lines represent introns and 5'-flanking regions. The numbers in parentheses under each isoform are the accession numbers in GenBank. **(B)** Schematic protein structures of different isoforms of mouse NRF1. Abbreviations: NTD, N-terminal domain; AD1, acidic domain 1; NST, Asn/Ser/Thr-rich; AD2, acidic domain 2; SR, serine-repeat; Neh6L, Neh6-like; CNC, Cap 'n' collar; bZIP, basic-region zipper; CTD, C-terminal domain. Solid boxes represent unique sequences different from other isoforms. All the sequences are from the National Center for Biotechnology ([www.ncbi.nlm.nih.gov](http://www.ncbi.nlm.nih.gov)). The ID numbers for mouse isoform-742, -741, -583, -572, -453 and -313 are AF071084, NM\_008683, NM\_001130453, NM\_001130454, NM\_001130451 and BAB23483, respectively.

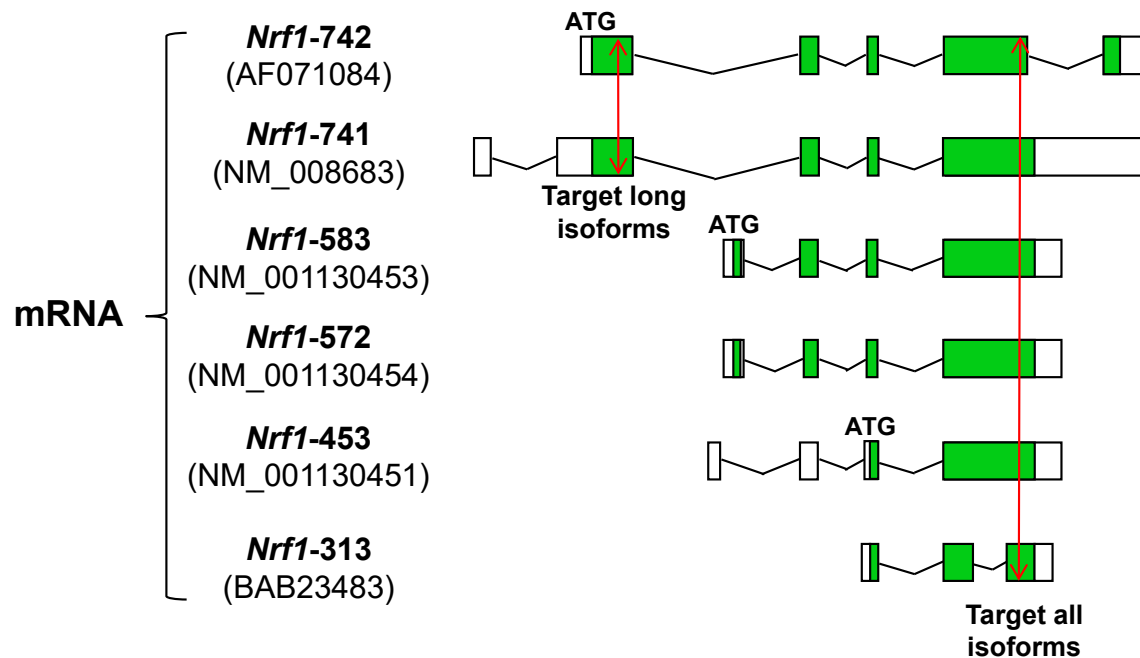

**Fig. S2. The target sites of shRNAs against mouse *Nrf1*.** Sequences are from the National Center for Biotechnology ([www.ncbi.nlm.nih.gov](http://www.ncbi.nlm.nih.gov)) and Ensemble Genome Browser ([www.ensembl.org](http://www.ensembl.org)). Green and white open boxes represent coding regions and untranslated regions, respectively. Solid black lines represent introns. Solid red lines with arrowhead are the target sites of the shRNAs used. The numbers in parentheses under each isoform are the accession numbers in GenBank.

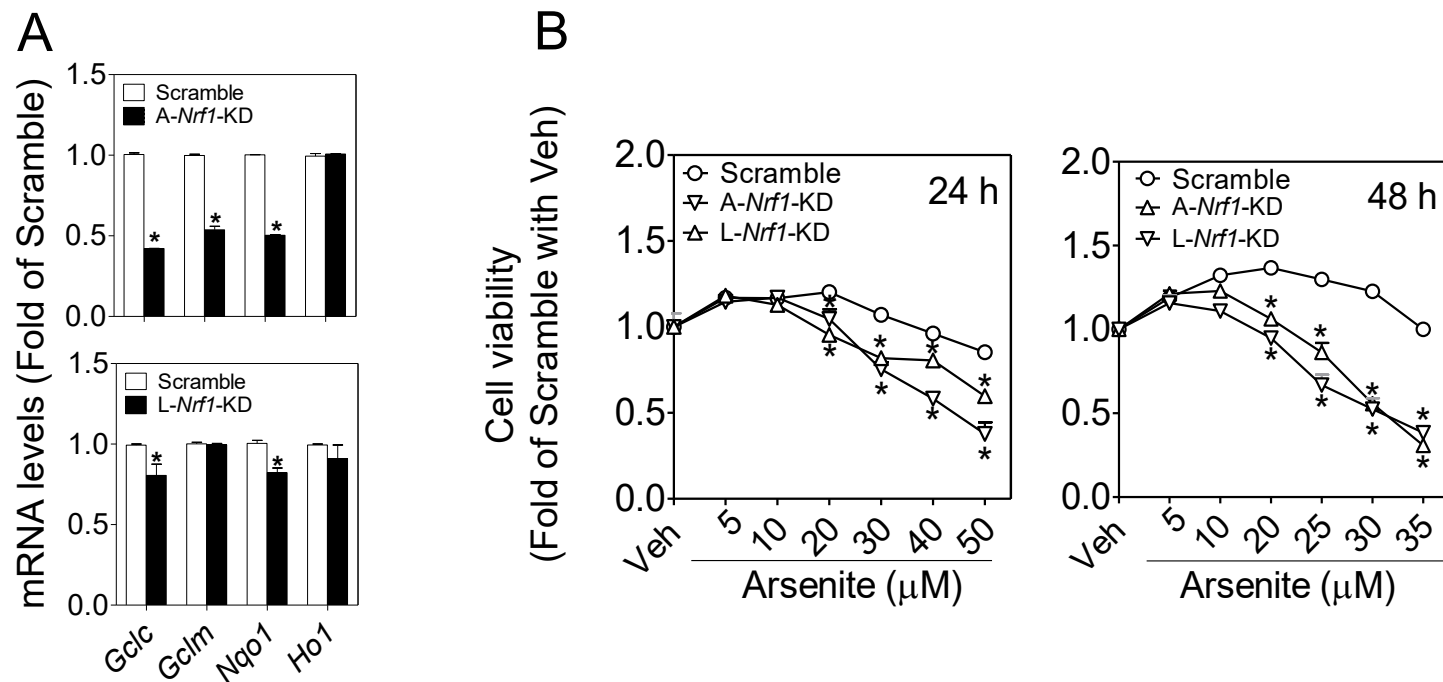

**Fig. S3. Stable knockdown of *Nrf1* reduces the expression of antioxidant genes and increases sensitivity to arsenite-induced cytotoxicity in 3T3-L1 preadipocytes.** (A) mRNA expression of ARE-dependent antioxidant genes. A-*Nrf1*-KD, knockdown of all isoforms of *Nrf1*; L-*Nrf1*-KD, knockdown of long isoforms of *Nrf1*. n = 3. \**p* < 0.05 vs. Scramble. (B) Cell viability following arsenite exposure for 24 and 48 hours. n = 3. \**p* < 0.05 vs. Scramble with the same treatment. Veh, Vehicle (medium).

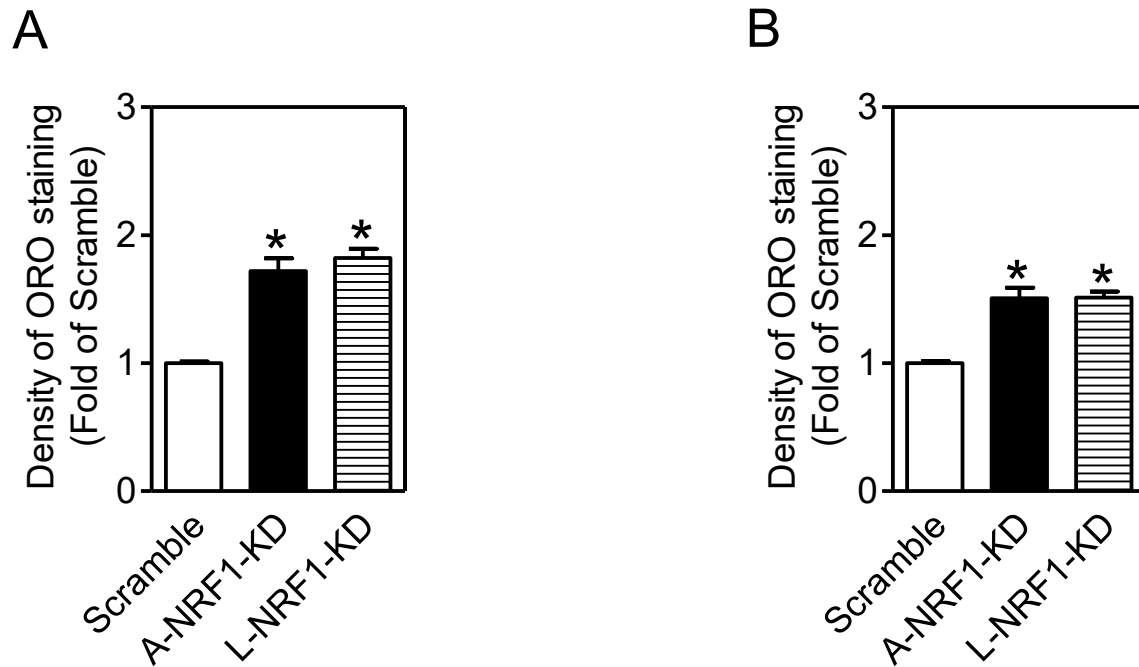

**Fig. S4. The quantification of Oil-red O staining in Fig. 3A. (A)** DMI treatment for 5 days. **(B)** DMIRI treatment for 5 days. The images were analyzed by Image J software and expressed as mean  $\pm$  SD. n = 3. \* $p < 0.05$  vs. Scramble.



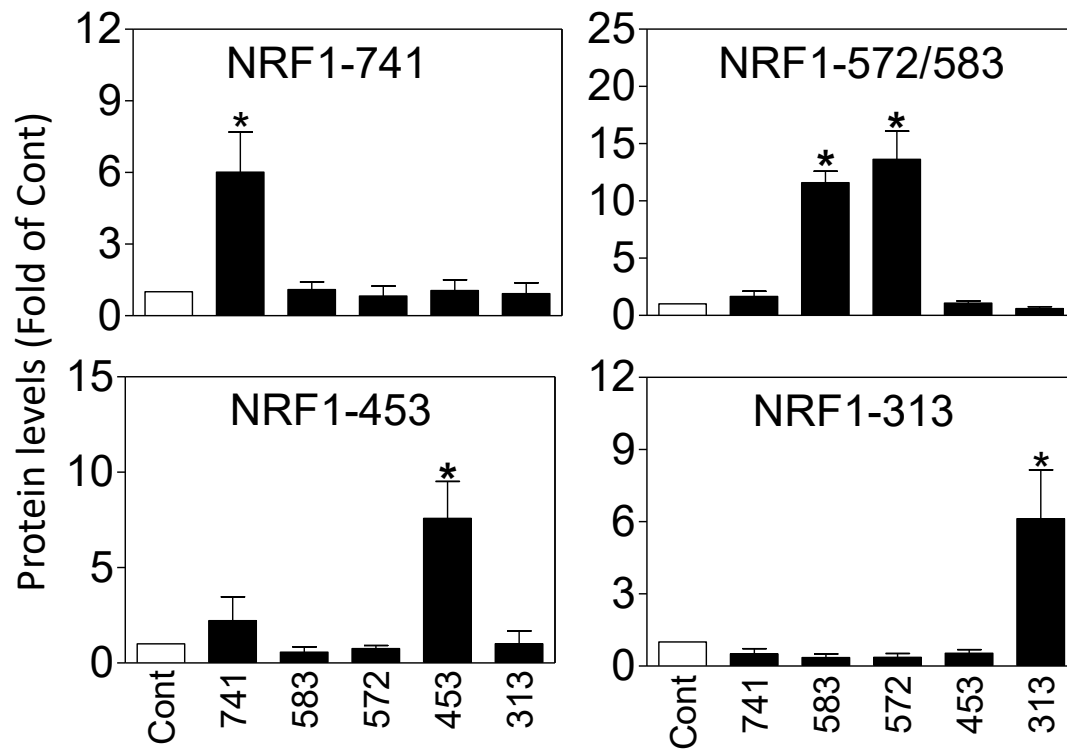

**Fig. S5. Quantification of Western blot in Fig. 5B.** The data was normalized with  $\beta$ -ACTIN and presented as the fold of Cont. Cont, Control; NRF1-313, -453, -572/583 and -741 refer to the cells overexpressed indicated isoforms of NRF1, respectively. n = 3. \*  $p < 0.05$  vs. Cont.

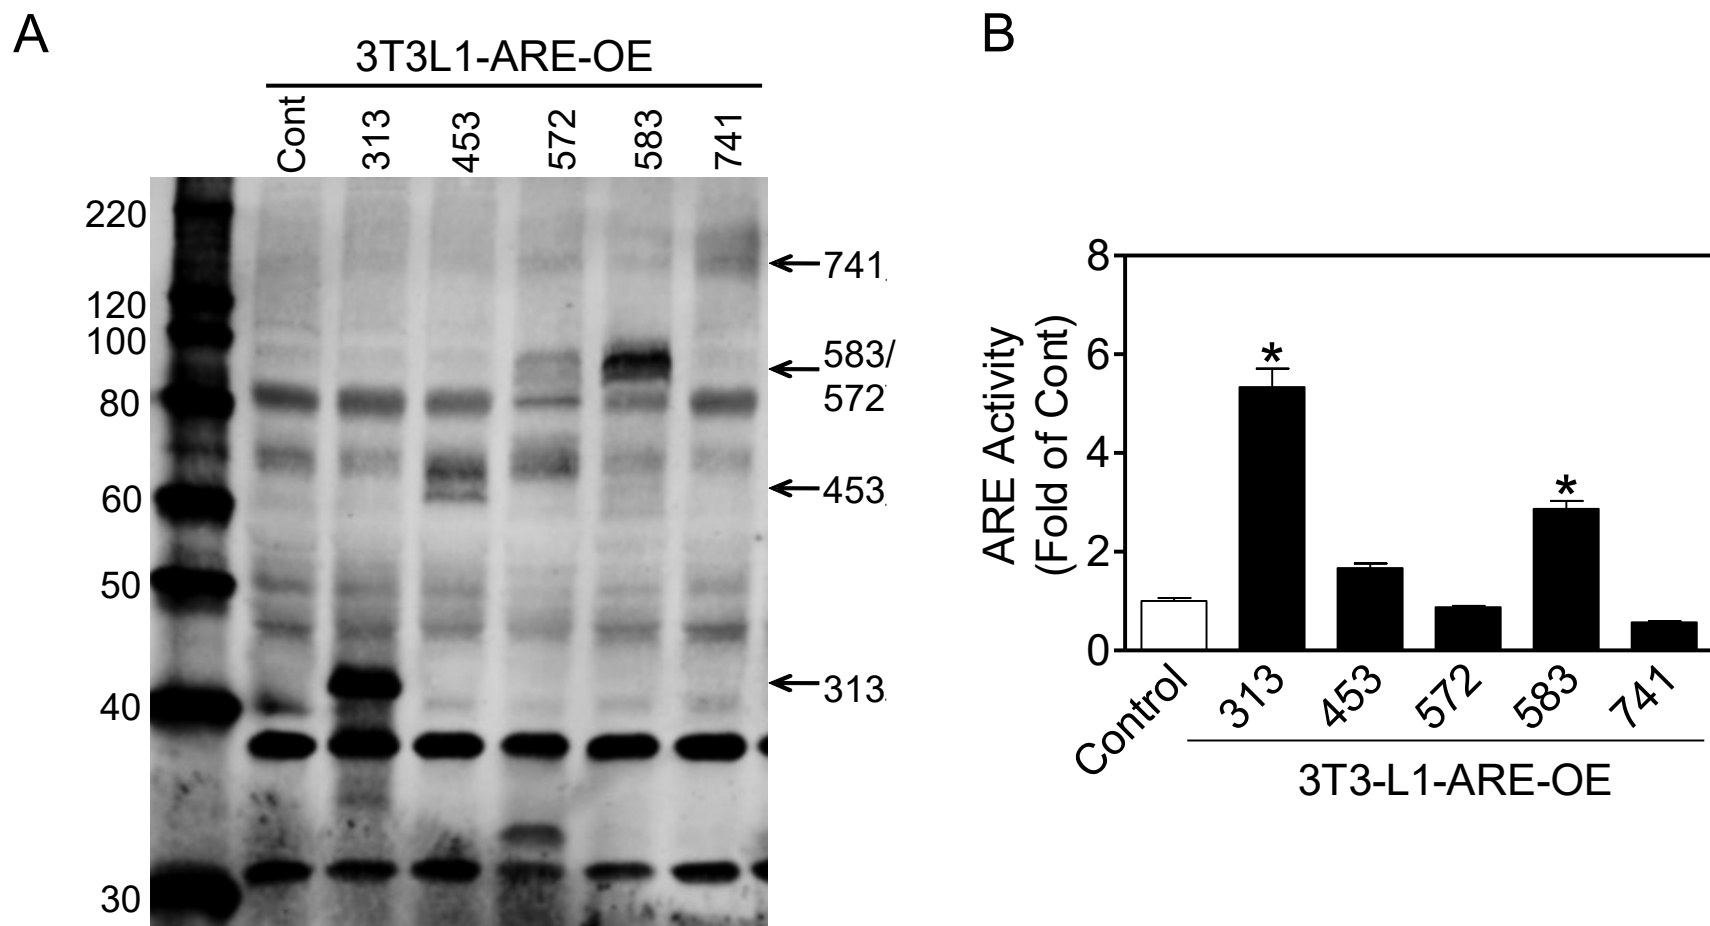

**Fig. S6. Effect of overexpression of various isoforms of NRF1 on ARE activity in 3T3-L1 cells under basal condition.** (A) Representative image of NRF1 immunoblots in 3T3-L1 cells which were overexpressed various isoforms of NRF1 and signal Lenti ARE reporter. 3T3L1-ARE-OE cells, 3T3-L1-ARE cells generated in our previous study [31]) were overexpressed with various isoforms of NRF1. Cont (Control), 313, 453, 572, 583 and 741 represent the 3T3-L1-ARE cells that were transduced with lentivirus expressing an empty vector and various isoforms of NRF1, respectively. (B) ARE activity in 3T3L1-ARE-OE cells under normal culture condition.  $n = 3$ ; \*  $p < 0.05$  vs. Control.

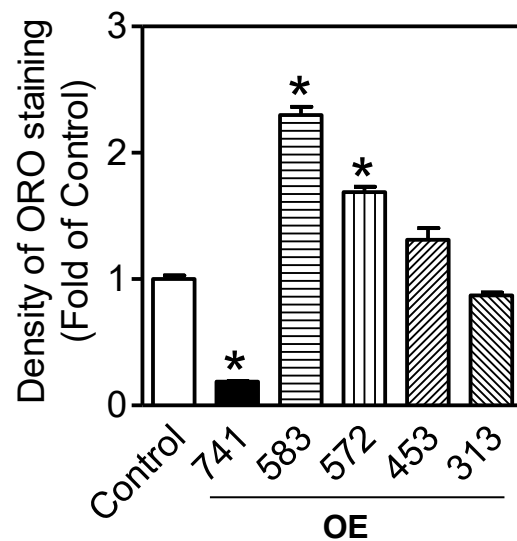

**Fig. S7. The quantification of Oil-red O staining in Fig. 5C.** Representative images of Oil-red O staining in Control, NRF1-741, -583, -572, -453, and -313 cells induced by hormonal cocktail of DMI were analyzed by Image J software and expressed as mean  $\pm$  SD.  $n = 3$ . \*  $p < 0.05$  vs. Control.

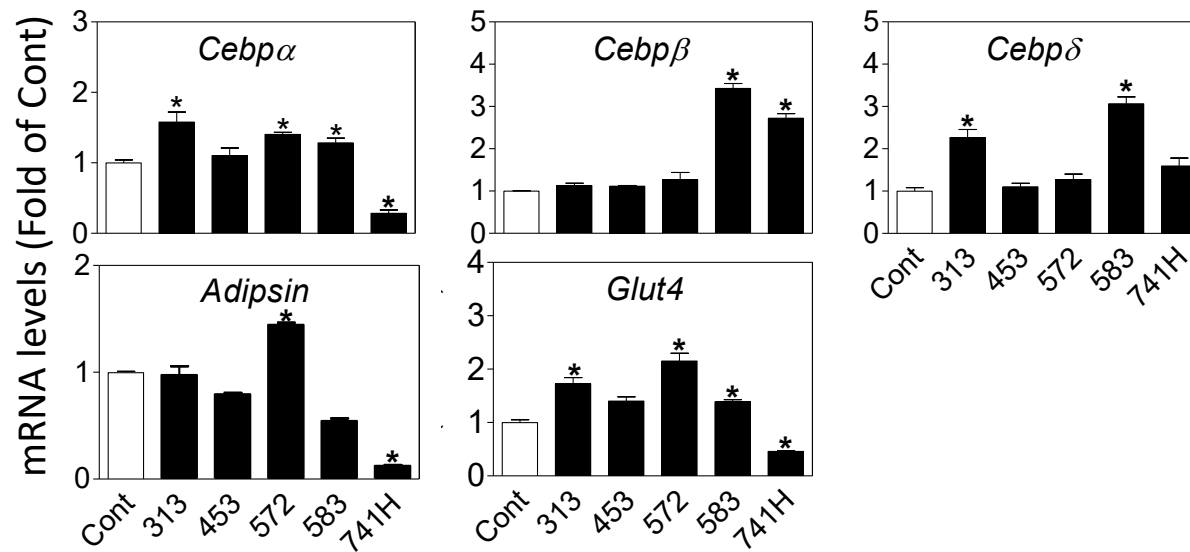

**Fig. S8. Overexpression of L-NRF1-741 suppressed the expression of adipogenic genes in 3T3-L1 cells.** The mRNA expression of adipogenic markers in control and various *Nrf1*-OE cells under normal culture condition. Cont (Control), 313, 453, 572, 583, and 741 refer to the cells overexpressing indicated isoforms of NRF1. \*  $p < 0.05$  vs. Control.  $n = 3-5$ .

AATGATGGGACAACACATTGTAATAAACATTAGCTGTCTTAAACAACCCACACCGTGTAGCTATTTTGCTTCACTTGTGTGTTTT  
 ATGTGTTATGTGGTTCAAATATGCCACCAGATATGTAAGCAACATTTAT**TGAACCTGC**CTGTGCGCAGGCTCTGTGTTTATTTAA  
 ACTATGACTTTTGTATTGATTGGTT**TTAAAGTCC**ATAAGAGTACACACATTTTATTCATTAGTACCCCTAGCAACAAGCTTAAG  
 GCTTGCCATCTCTTATATTGTCAATAAATA**TTTGTTGGC**CGGGCAGTGGTGGTGCACACCTTAAATCCCAGCACCTGGGAGGCAG  
 AGGCAGGTGGATTTCTGAGTTCGAGGCCAGCCTGGTCTACAGAGTGAGTTCAGGACAACCAGGGCTACACAGAGAAACCTGTG  
 TCAAAAAACCAAATAGATAGATAGATAGATAGATAGATAGATAGATAGATAGATAGATAGATAGATAGATAGATAGATAGATAGAT  
 TGTTGAACAAATGAATGAATAGAATGATCAAGAGGCTTTTGCATCAAGTAAAGCATAGGGCAAAAAGAAGGGCGTTAAACACAA  
 TCCTAGGAGCAGATGCTACCAGATTCATGTACTGCTGAATTAACGTCTAAAATAATTTGTGTGATTGAATAACAAGCACACAATA  
 GAAGTAGAGGTTTCAGAAAG**CCTAGTTAA**CCAGTAGATACACAAGTTAAATGTTCCCTTTTGAAGGAAGGGAAGGGAAGAGAAT  
 GAGGGAAAAGGAAGAAATAGGTAGAGTCCAAAATCCATCCCTTGAAGAAGGTTGGGAAGACTATATCTATGTGGAGCCCAACC  
 CAGATAATAACAGAGACTAAAACAAAACCTGAGAACCAGG**TGAAATTGC**TGACCTTAGAAATCAAATGTAGAAGATCCACTCTGA  
 GTCAAATGAAAT**TGAGTGGC**TACATTGAGAGAATGAATAGACATGGGAAAAGAAGGTATTGCTAGACCAGCCCCACTTTACCATT  
 AGTCATTGGTAT**TGAAAACGG**GATAATATAGGTACTCA**TTAATATCC**CTTAAGGAAGAAGCTCCTCTTCTCTATCCCAGTGGT  
**TTCTGAGC**ACTGGAGACAAGTTCCAATCCAGCCTCGCCTAATCTTTTAAATTTAGAAGACACAGGTATTATCAAGGGCCCTCA  
**TTTTCATCTTT****TTACACTCC**TTCTAAAATAGTATCACTCTGCCAAATGTTAGCATTTCAAAATACCCCATGCAAAAAT**TTAAGGAG**  
**G**TTCTAATAAATGTTTCCCTTT**TGAGGGTGG**GATACTGAGAATCAAACCCAGGGCTACACATGCCAAGCAAAAGCTCTACCACA  
 AAGCTACACCTCTCCCCCTCACTATGTTTAAAAGGTTAAACCAGGATCTGGGGACAGGAATAAGGGAACCAAGTGATATATTGA  
**ATTTCATAGG**AAGTGAAGCTGAAGTTTACATTCAGACACAGATGCCAGGGATAGCACACAGGAGTATCTATAGATAGAAATAGG  
 ACTCCAGCTTTTGTCTATCTGTAAAATTTGTTTCTGTTTGTGTTTCTGGTTTTGACTTTAATGATTAATTTAGTGATTGGTTTTA  
 GTGATGCTTTTGACCTGTAAGTCCACCAAAAAATTTGAGCTCCATTACATCCTTAAGTAGTGA**CGTTTCTAA**GCATTGAGAAG  
 AAAAGAGAAATTTATTTATTAAGAATCAAGTTAAATAGAGATAAAAATAATCCAACACAGTGATCCCCCATCATTGGACTACT  
 GAAAAACATACTTTAACTTGAATTACTTTAGTAATGTTTGGGGGGAGTCAATTAATGATGTAATTGCCAACTTCTCGATTCACT  
 GACTGATATTTAGACCTAGTGAGCATTTCCTATTGAGCTATTGCTTCATTAT**TGACAGAGG**AACTCTTGCTAGTCCCCCTGAAG  
 AATGAATAGTTACTCAACATAGATTAACATAGATATAGTTATTCCATTGGGGGTATCAGGATAAATAAATTAGGGGAATTTAT  
 TGCCATCTGATACACTGCCCTG**TGTAAGGGC**CTTT**TTAAAGTCC**ACAAGTCACTGAATTATATTAGGTCACCTATG**TGACAAGGG**  
 CTGCTCCCACGTTAGCAGTTTGGCACAGCTAGGTTTTTTTTCTGCCAAAAGGGCAAAGGCCTTAAGCAAGAAGCCAGAGTTTTCT  
 CTGATTACAAAACCTGACCACAATTCCTTGCCAACTAGCAGGGTAATTTTTTTTTCTTCTGGTAATACATTATTCTCAGGGAGGG  
 CTCCAATTTTTTTCATTG**TGACATAGC**ACTTATCACTTAAACATCAACCATTGGAATACTAC**TGCAGTTGC**TATTGATAGATAAAC  
 AAATTTAAAACACAACTTTGATATATAAAAATTTAAATTT**TTACTAGCC**TTTATTCTGTCACTATTCCTTTTTATAGAATTTGGA  
 TAGCAGTAACATTTTGGACCTTTTATAGACTTGTGAATAAATCACCTTAGAAATGTAT**TTTGTACC**CTGTGTGGGTAACAAAAT  
 CTAAAATAAGAATGTGTATATGTTTGGAGTACAAGAATATCTTCAGATGTGTGATT**GGAGTTTCA**ACCAAAGATAAATACTTTAA  
 GAAAACCTTTGGCCAAATACG**TTTATCTGG**TGTTTCATAACTTAGAGATTAAGGTTTCTATT**TTAAAAGCC**ACTGGTGTGTATT  
 TTACTGCAATTTTTAAAAGCAATCAATATGAACAATCTCTGCTCGTTAATTCCAACTACTGT**CAGTTCACGCCCTCA**CAGA  
 ACAGTGAATGTGTGGGTCCTGGCAGACAATGTAGCAACGTTTTTCCCTTGAATGTACCAAGTCTTGCCAAAGCAGCAGACAGCA  
 TTA**TGACACACC**ATTTTGTCACACTGGCTCTCAGTCAGGACAGTGCCAGCCAATTCAGGCCTGATTCTTCTGTGTTTATCCC  
 ACCTCTCCCAAATATTTGAAAACCTGGTGTCTTGACTTATTAGCATATTCATAAGCTCGATGACCATAAGCCTTTTCTCTTAACC  
 +1  
 AACCAATCTTTTGAAGACATAGA**C**AAAACACCAGTGTGAATTACAGCAAATCTCTGTTTTATGCTGTTATGGGTGAAACTCTGG  
 GAGATTCTCTGTTGACCCAGAGCATGGTGCCTTCGCTGATGCATGCCTATGAGCACTTCACAAGGTAAGT

**Fig. S9. Identification of ARE sites on the promoter region of mouse *Ppar2* gene.** The ARE sites were defined according to the consensus sequences proposed by Chorley BN, et al. (Nucleic Acids Research, 2012, 40, No.15. DOI:10.1093/nar/gks409.) . Yellow highlights, ARE sites; +1, transcriptional start site.

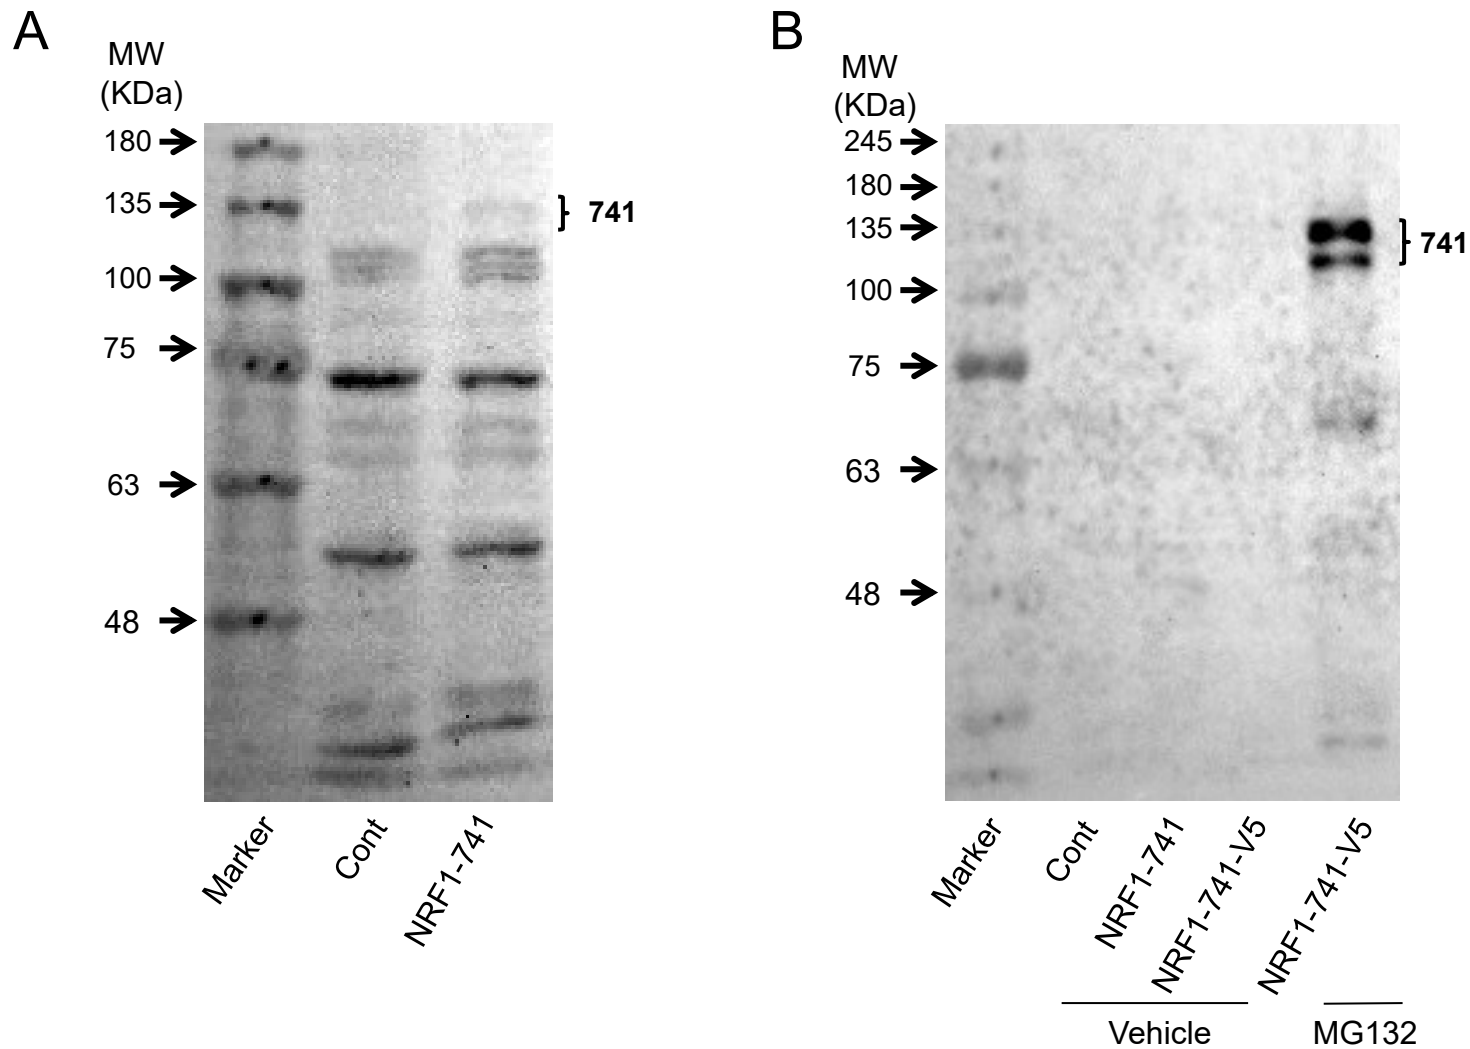

**Fig. S10. Overexpression of L-NRF1-741 in 3T3-L1 cells.** (A) NRF1 protein levels detected by antibody (#12936-1-AP, Proteintech Group, Inc) against NRF1 in Control and NRF1-741 cells. Cont, Control; NRF-741 refers to the cells overexpressing isoform of 741 aa of NRF1. (B) Western blot analysis of NRF1 protein with antibody against V5 epitope tag in Control, NRF1-741, NRF1-741-V5 cells with or without 10  $\mu$ M MG132 treatment. NRF1-741-V5 refers to the cells overexpressing V5-tagged NRF1-741 isoform.
